# Supplementary material
Source: PubMed Central journal article supplement (PMC10100713)
Supplement: spectrum.04438-22-s0001.pdf [file spectrum.04438-22-s0001.pdf]

## SUPPLEMENTARY MATERIALS

### Expression of human endogenous retrovirus group K (HERV-K) HML-2 correlates with immune activation of macrophages and type I interferon response

Eric Russ, Natallia Mikhalkevich and Sergey Iordanskiy

#### List of supplementary tables (Excel files)

**Supplementary Table S1.** Log<sub>2</sub>(fold-change) and false-discovery rate adjusted p-value following macrophage M1 (LPS + IFN $\gamma$ ), M2 (IL10), and M2 (IL4) polarization for retroelements and HML-2 loci.

**Supplementary Table S2.** Comparison of FGL1 and HML2\_8p22 expression in primary MDMs and TDMs.

**Supplementary Table S3.** Log<sub>2</sub>(fold-change) and false-discovery rate adjusted p-value following TLR agonist (top) or IFN (bottom) treatment for retroelements and HML-2 loci.

**Supplementary Table S4.** CPM values and relative expression of genes which 1) contain a GAS but not an ISRE site, 2) contain an ISRE but not a GAS site or 3) contain both GAS/ISRE sites.

**Supplementary Table S5.** Predicted transcription factors binding sites (TFBSs) by the PROMO software algorithm in LTR12F, the 5'LTR of 1q22, and the 5'LTR of 3q12.3.

**Supplementary Table S6.** Predicted targets of the HML-2-shRNA; Genome analysis data.

**Supplementary Table S7.** Reagents and resources.

## Supplementary figures

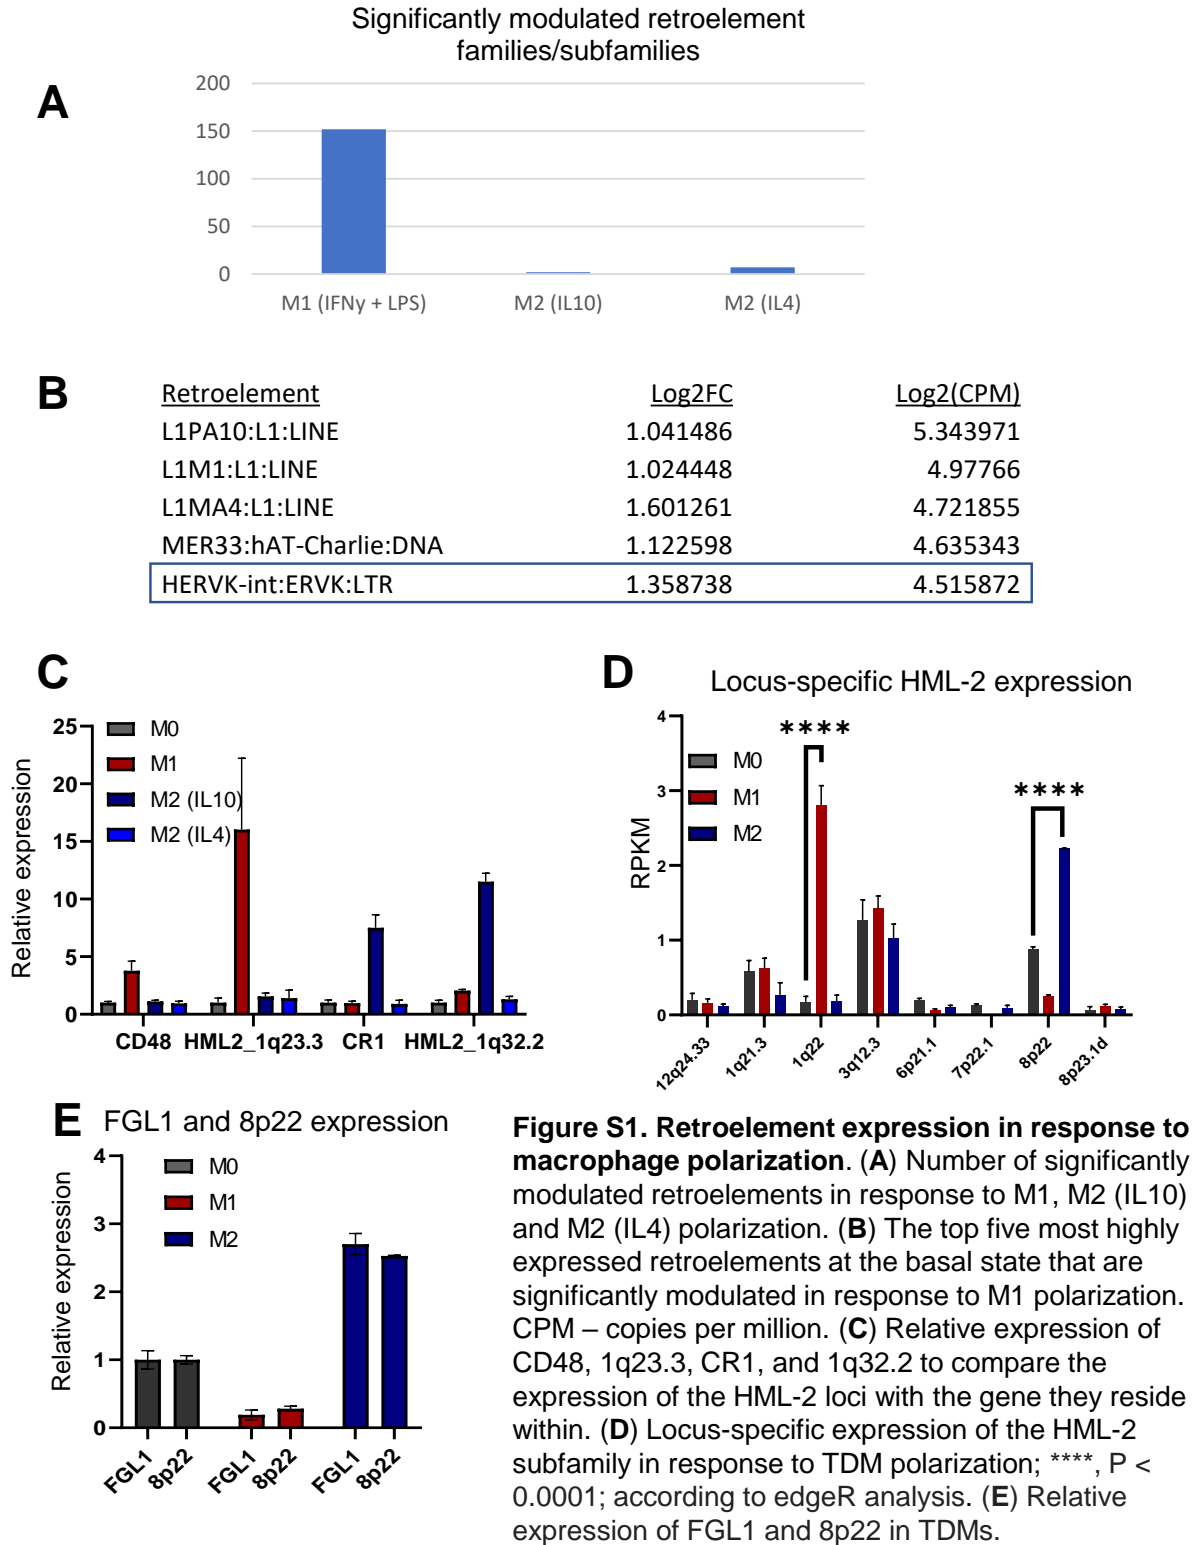

*P* value for correlation:  
7.60552885105501e-007

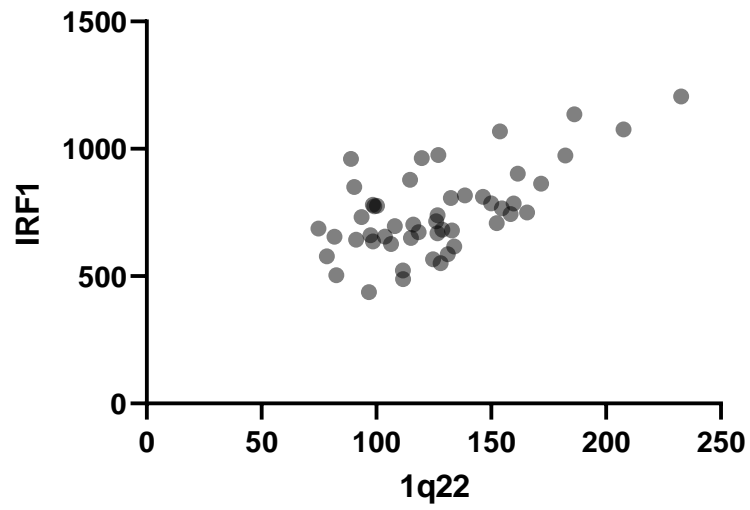

**Figure S2. Correlation between IRF1 and HERV-K102 expression in cutaneous leishmaniasis patients.** Pearson's *r* correlation between HERV-K102 and IRF1 expression in CL patients.

**A**

| Antibody target (or ATAC) | Chromosome | Beginning of peak | End of peak | Peak length | Peak summit | Fold-enrichment | Adjusted p value | Cell type |
|---------------------------|------------|-------------------|-------------|-------------|-------------|-----------------|------------------|-----------|
| STAT1                     | chr1       | 155637480         | 155637773   | 294         | 155637658   | 7.6404          | 3.19963E-55      | MDM       |
| IRF1                      | chr1       | 155637408         | 155637777   | 370         | 155637618   | 12.0589         | 5.1523E-142      | MDM       |
| H3K27ac                   | chr1       | 155635819         | 155637517   | 1699        | 155637434   | 2.16843         | 9.49511E-19      | MDM       |
| ATAC                      | chr1       | 155637202         | 155637965   | 764         | 155637572   | 3.03479         | 2.66073E-15      | HeLa      |
| H3K4me2                   | chr1       | 155635765         | 155636040   | 276         | 155635902   | 6.88336         | 2.58941E-13      | HeLa      |
| H3K4me2                   | chr1       | 155636160         | 155637384   | 1225        | 155636513   | 6.62564         | 1.43648E-22      | HeLa      |
| H3K79me2                  | chr1       | 155636013         | 155636536   | 524         | 155636280   | 3.8251          | 0.00014639       | HeLa      |
| H3K27ac                   | chr1       | 155635965         | 155637572   | 1608        | 155637302   | 4.08018         | 2.22382E-14      | HeLa      |

**B**

**LTR12F\_1q22 Solo LTR (chr1:155637452-155637661):**

CCGTTGGGAAGACCCAAGGGAAGGTGGTATACCTTCGAAATGAAAGCGAAAGTGAAATGAAAGTGAAAA CGAAATTATTTAGAACG  
 GTGGCGTGTGAGAAACCCAGACGTACAAGAGATTACCTCGACATTGTCAGTGGTACTCCAGGTACCGAAGAAAGGAACCTCGGA  
 CACTTTGGTGCTTGGGAAGTTAGTTCTTTCTGGAAC

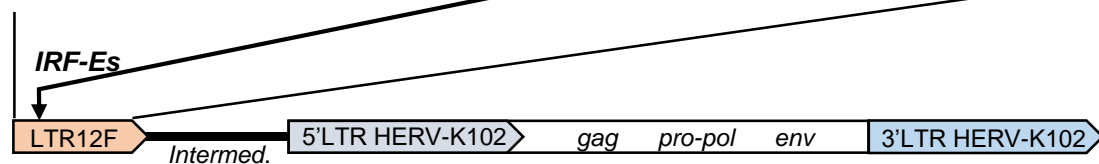

Conserved IRF-E motif: **AANNGAAA** (55)

Sequence motifs in LTR12F that are enriched in IRF-1 binding sites (56):

- 1) **GAAAGCGAAAGT**
- 2) **GAAAGTGAAA**
- 3) **TGAAAGTGAAAA**

**Figure S3. ChIP-seq and ATAC-seq analysis of HERV-K102. (A)** Peaks identified by MACS2 as significantly enriched within 10kb +/- of HERV-K102. **(B)** Location of three potential IRF-E sites within LTR12F.

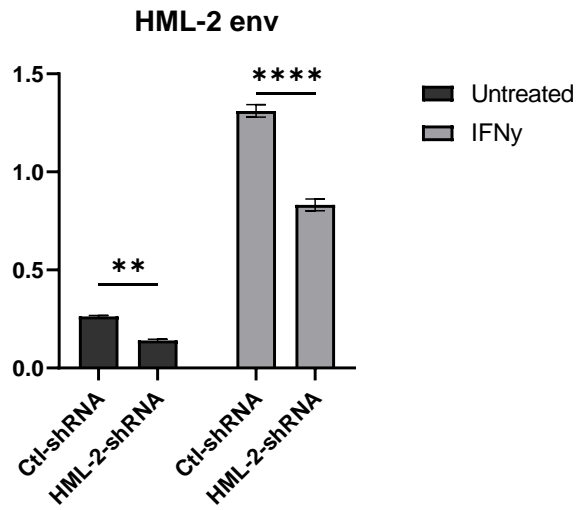

**Figure S4. HML-2 env knockdown efficiency.** Relative HML-2 env expression in control-shRNA and HML-2-shRNA expressing TDMs following IFN $\gamma$  treatment. The data are presented as mean values  $\pm$  SEM from three biological replicates. \*\*\*\*,  $P < 0.0001$  according to two-way Anova.
